# Supplementary material for: Two structurally diverse Zn-based coordination polymers with excellent antibacterial activity
Source: Royal Society of Chemistry journal article supplement (doi:10.1039/c8ce00394g), 2018-01-01
Supplement: c8ce00394g1.pdf [file c8ce00394g1.pdf]

## Electronic Supplementary Information

# Two structurally diverse Zn-based coordination polymers with excellent antibacterial activity

*Ian R. Colinas, Mauricio D. Rojas-Andrade, Indranil Chakraborty and Scott R. J. Oliver\**

*E-mail: soliver@ucsc.edu*

University of California, Santa Cruz, Department of Chemistry and Biochemistry,  
1156 High Street, Santa Cruz, California, 95064, United States

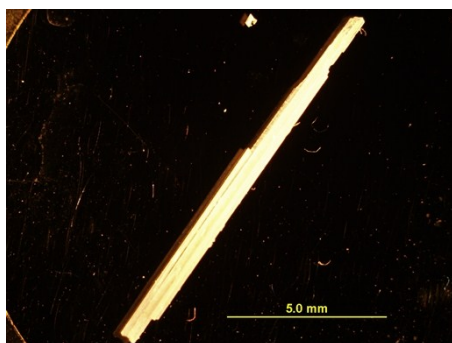

**Figure S1.** Optical micrograph of SLUG-39 crystals.

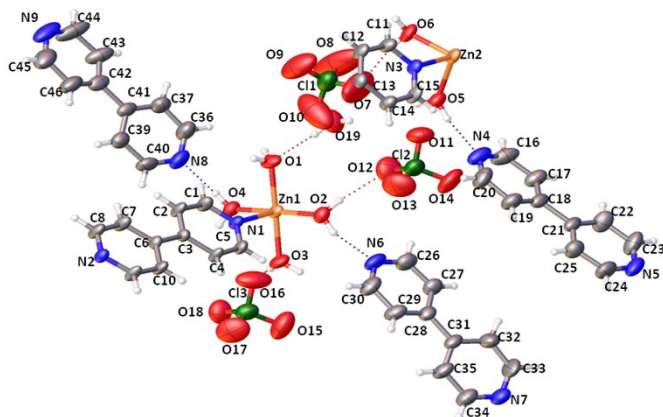

**Figure S2.** ORTEP diagram and atomic labeling of SLUG-39. Thermal ellipsoids are shown at 50% probability.

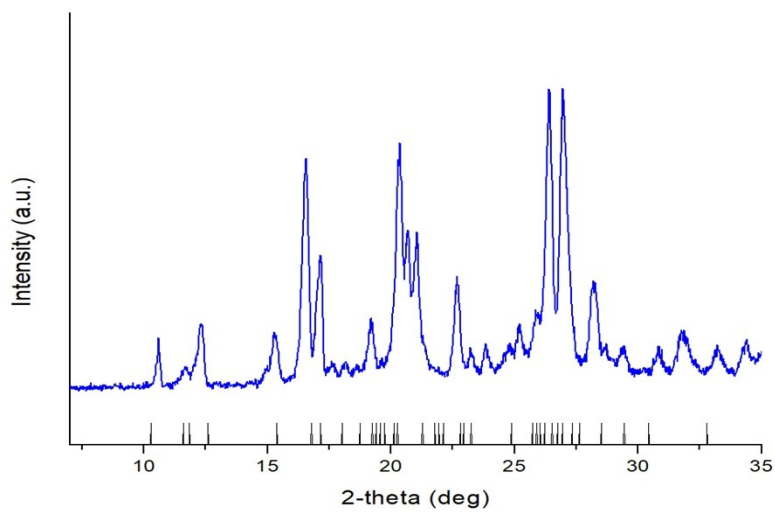

**Figure S3.** PXRD of as-synthesized SLUG-39. The theoretical peaks based on the single crystal structure solution are shown as bars at the bottom.

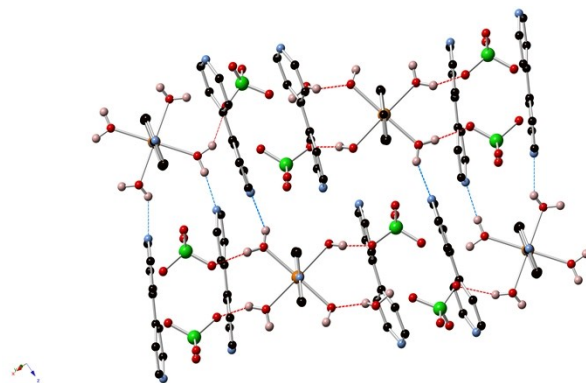

**Figure S4.** Extended structure of SLUG-39 depicting the hydrogen bonding interaction (dashed blue lines) between the terminal waters of the chains and the free waters and neighboring free 4,4'-bipy molecules.

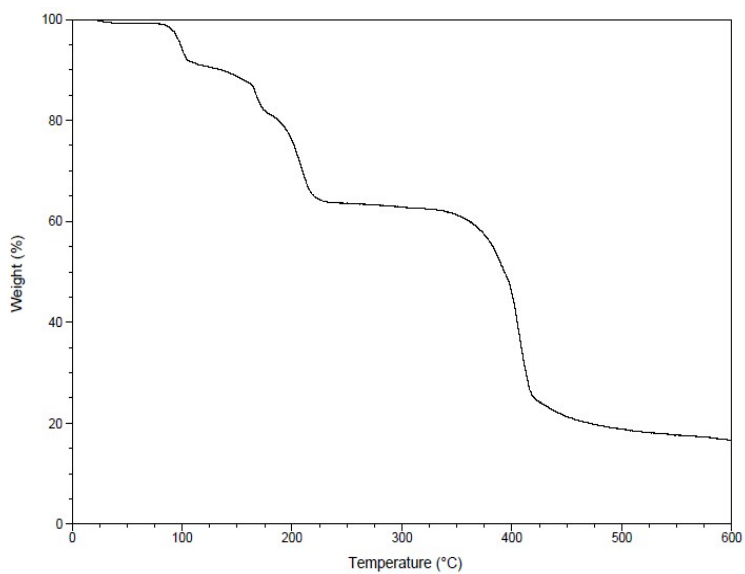

**Figure S5.** Thermogravimetric profile of SLUG-39.

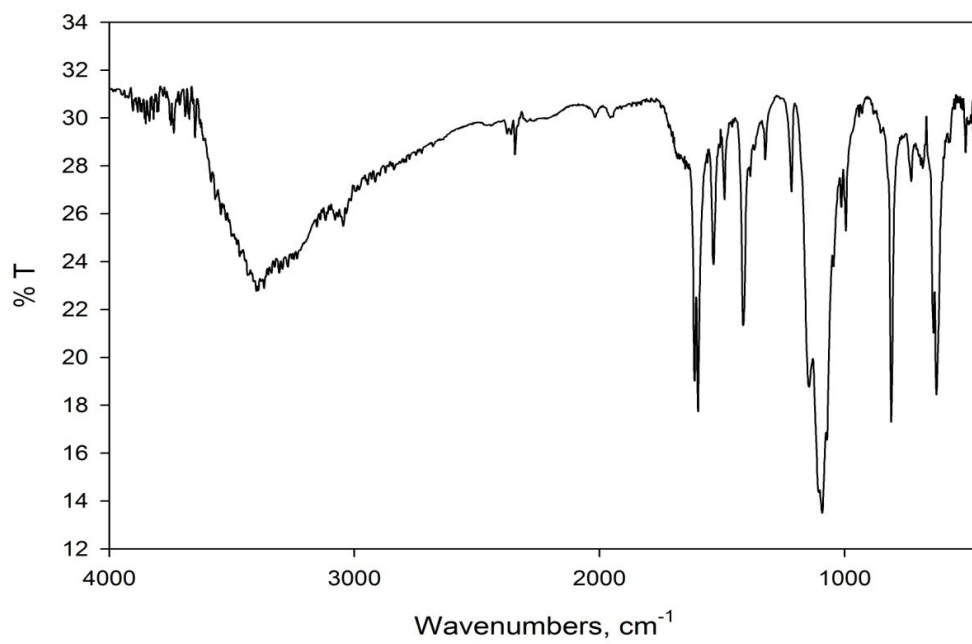

**Figure S6.** FTIR spectrum of as-synthesized SLUG-39.

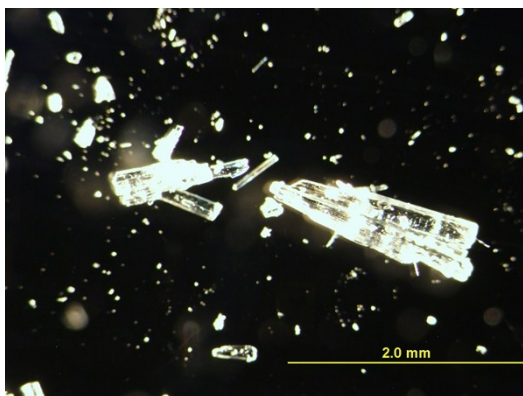

**Figure S7.** Optical micrograph of SLUG-40 crystals.

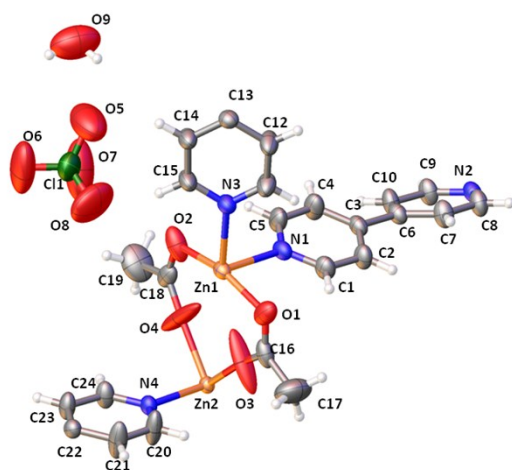

**Figure S8.** ORTEP diagram and atomic labeling of SLUG-40. Thermal ellipsoids are shown at 50% probability.

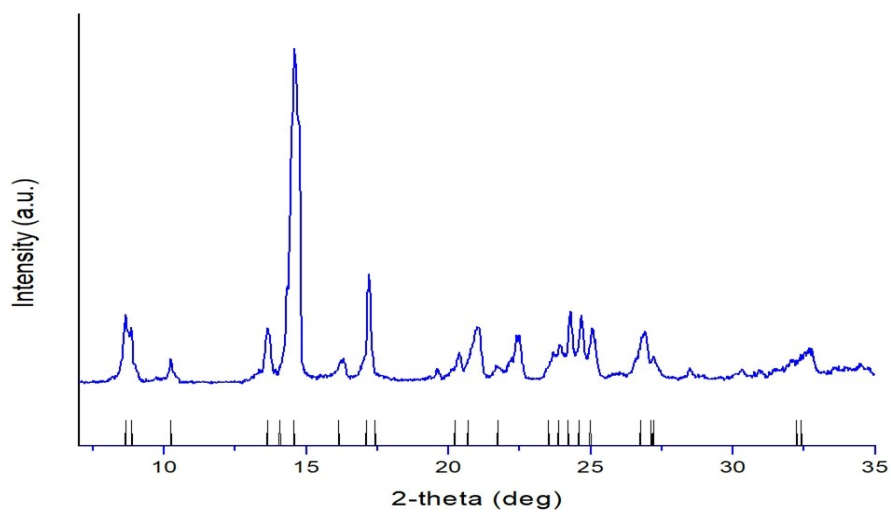

**Figure S9.** PXRD of as-synthesized SLUG-40. The theoretical peaks based on the single crystal structure solution are shown as bars at the bottom.

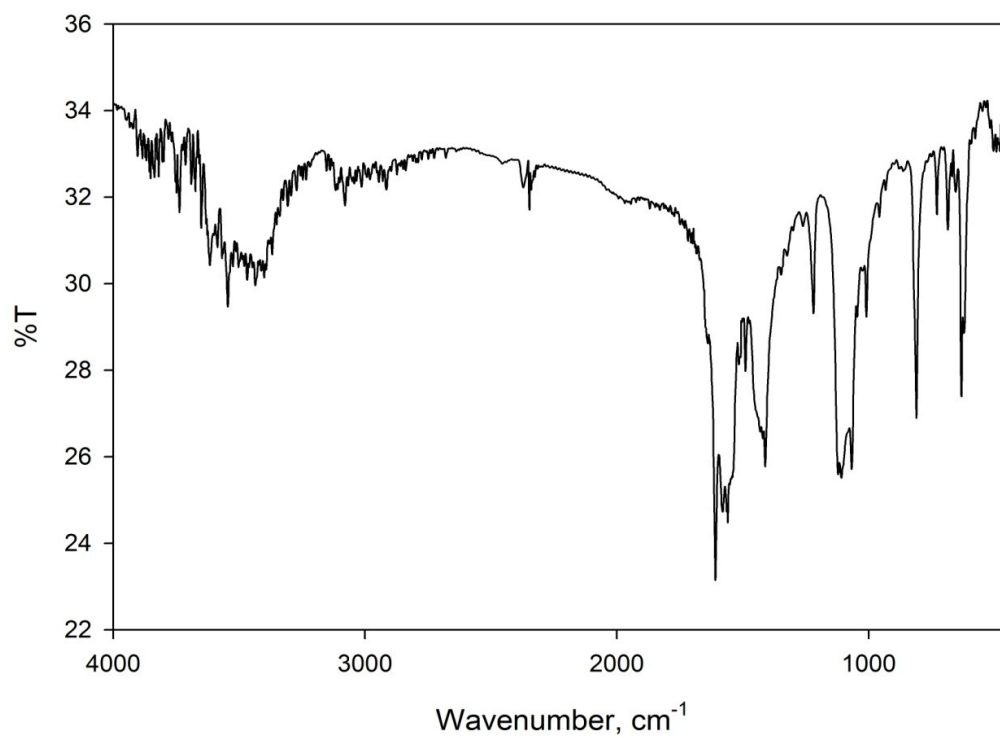

**Figure S10.** FTIR spectrum of as-synthesized SLUG-40.

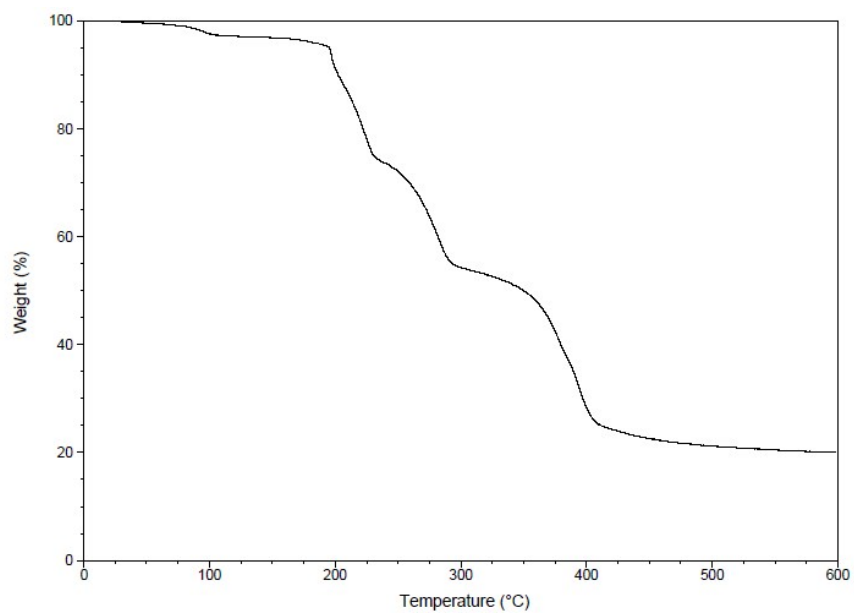

**Figure S11.** Thermogravimetric profile of SLUG-40.

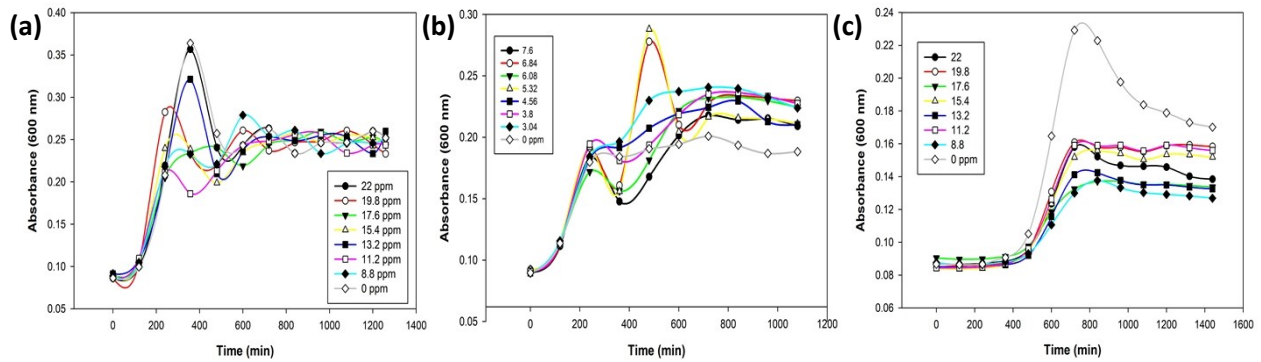

**Figure S12.** Bacterial growth curves of *E. coli* displaying no inhibition in the presence of: (a) 4,4'-bipy; (b) NaClO<sub>4</sub>; (c) Bacterial growth curves of *S. epidermidis* displaying no inhibition in the presence of 4,4'-bipy.

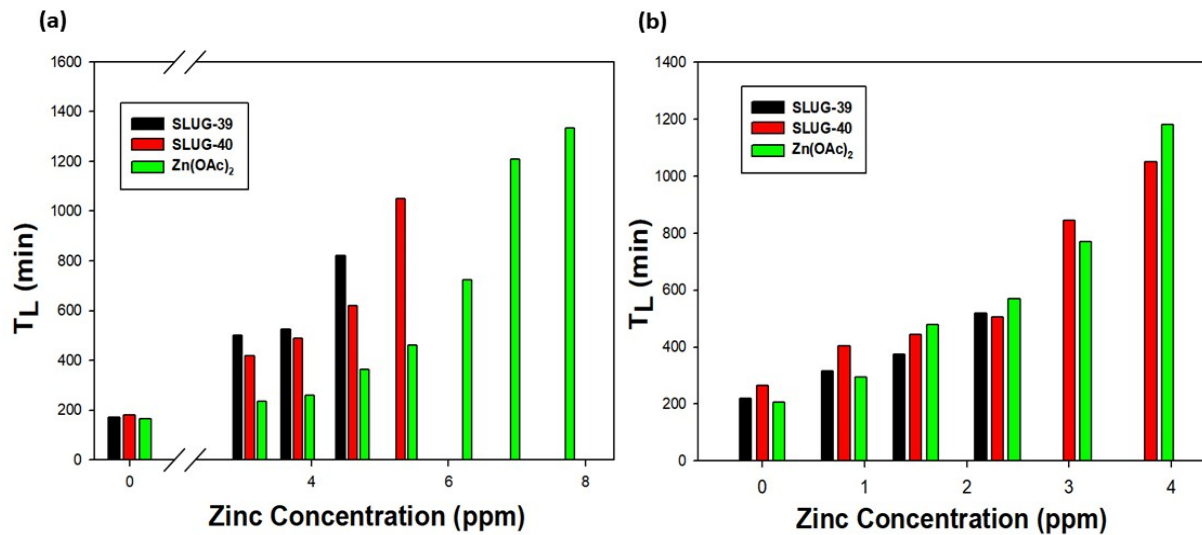

**Figure S13.** Bar chart summarizing lag phase durations ( $T_L$ ) of: (a) *E. coli* and (b) *S. epidermidis*; at varying concentrations of SLUG-39, SLUG-40, and Zn(OAc)<sub>2</sub> normalized by their zinc content.

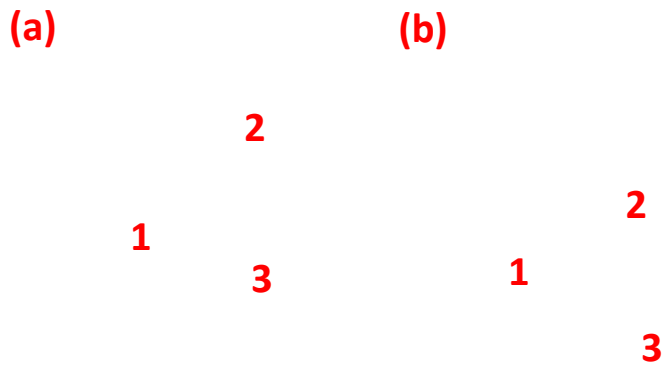

**Figure S14.** Agar diffusion test of: (a) *E. coli*; (b) *S. epidermidis*, treated with: (1) KBr; (2) 4,4'-bipy; (3) NaClO<sub>4</sub>.

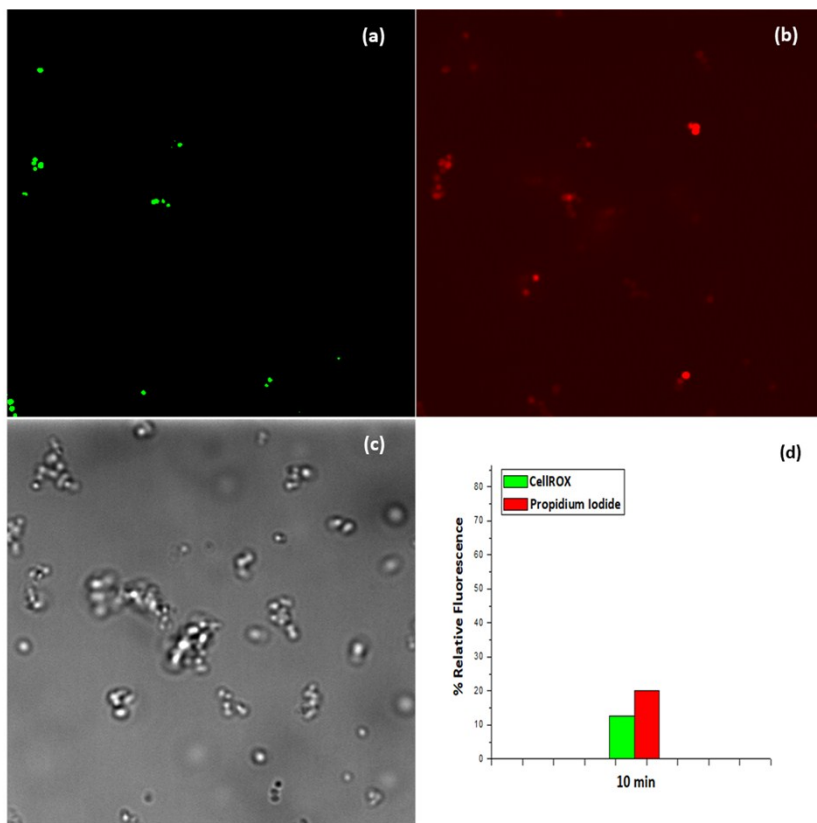

**Figure S15.** Fluorescence microscopy images of *S. epidermidis* incubated with 5 μM CellROX Green and 10 μM propidium iodide in water after 10 min: (a) 488 nm excitation, 500-550 emission ; (b) 561 nm excitation, 573-613 nm emission; (c) Bright-field channel; (d) Relative fluorescence from CellROX Green and propidium iodide.



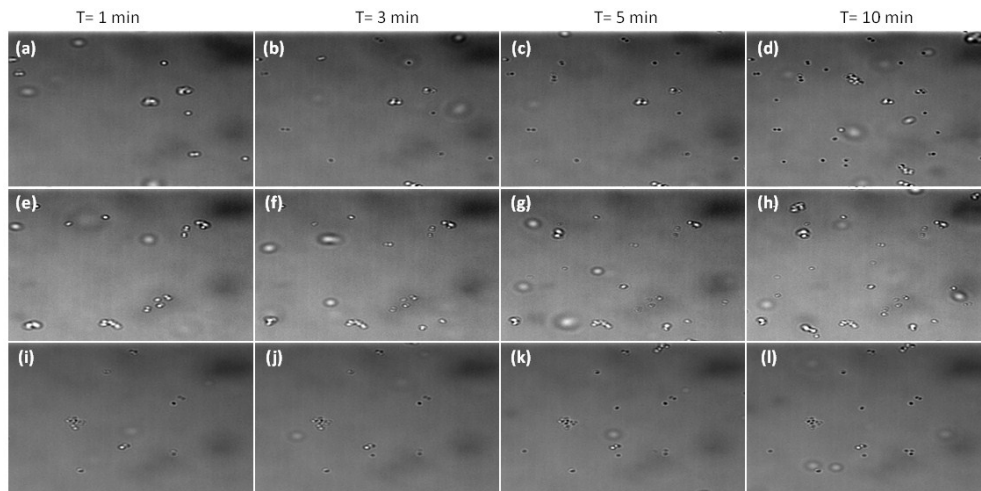

**Figure S16.** Bright-field microscopy images of *S. epidermidis* incubated with 5  $\mu$ M CellROX and 10  $\mu$ M propidium iodide treated with: (a-d) SLUG-39; (e-h) SLUG-40; (i-l) Zn(OAc)<sub>2</sub>.
